# Supplementary material for: Molecular and Serological Characterization of the SARS-CoV-2 Delta Variant in Bangladesh in 2021
Source: MDPI journal article supplement (doi:10.3390/v13112310), 2021-11-19
Supplement: s1 [file s1]

**Table S1.** PCR primer pairs for sequencing of the SARS CoV-2spike protein. The six forward (F) and reverse (R) primers are listed with their position in SARS CoV-2 genomic sequence and the corresponding amplicon fragment size.

| Primer Name | Sequence (5′ - 3′)            | Position NC_045512 | PCR Fragment Size |
|-------------|-------------------------------|--------------------|-------------------|
| Spike F1    | TgCCACTAgTCTCTAgTCAgTgTgT     | 21585-21609        | 454 bp            |
| Spike R1    | AACTCTgAACTCACTTTCCATCCA      | 22039-22016        |                   |
| Spike F2    | gAAgACCCAgTCCCTACTTATTgT      | 21898-21921        | 432 bp            |
| Spike R2    | TgAAgAAgAATCACCaggAgTCA       | 22330-22308        |                   |
| Spike F3    | CAATaggTATTAACATCACTAggTTTCA  | 22251-22278        | 501 bp            |
| Spike R3    | gCATAgACATTAgtAAAgCagAgATCA   | 22752-22726        |                   |
| Spike F4    | TATTCTgTCCTATATAATTCCgCATCA   | 22655-22681        | 479 bp            |
| Spike R4    | AACAgTTgCTggTgCATgTAgA        | 23134-23113        |                   |
| Spike F5    | TTTCCTTTACAATCATATggTTTCCA    | 23030-23050        | 438 bp            |
| Spike R5    | AAACACgCCAAGTAggAgTAA         | 23468-23448        |                   |
| Spike F6    | CAAATACTTCTAACCaggTTgCTg      | 23367-23390        | 411 bp            |
| Spike R6    | gTACAATCTACTgATgTCTTggTCATAgA | 23778-23750        |                   |
